# Supplementary material
Source: PubMed Central journal article supplement (PMC8162272)
Supplement: NIHMS1699486-supplement-Supplementary.pdf [file NIHMS1699486-supplement-Supplementary.pdf]

## Supplementary Data

**Supplementary Fig. 1.**  $^1\text{H}$  NMR analyses of (A) Benzoic acid 4-sulfate (B) Vanillic acid 4-sulfate and (C) Isovanillic acid 3-sulfate. All spectra were recorded on a Varian Unity-300 MHz at 25°C in  $\text{D}_2\text{O}$ . The chemical shifts ( $\delta$ ) of proton resonances are reported relative to HOD. Peak shapes in the NMR spectra are abbreviated with the symbols 's' (singlet), 'd' (doublet), and 'dd' (double doublet).

### (A) Benzoic acid 4-sulfate

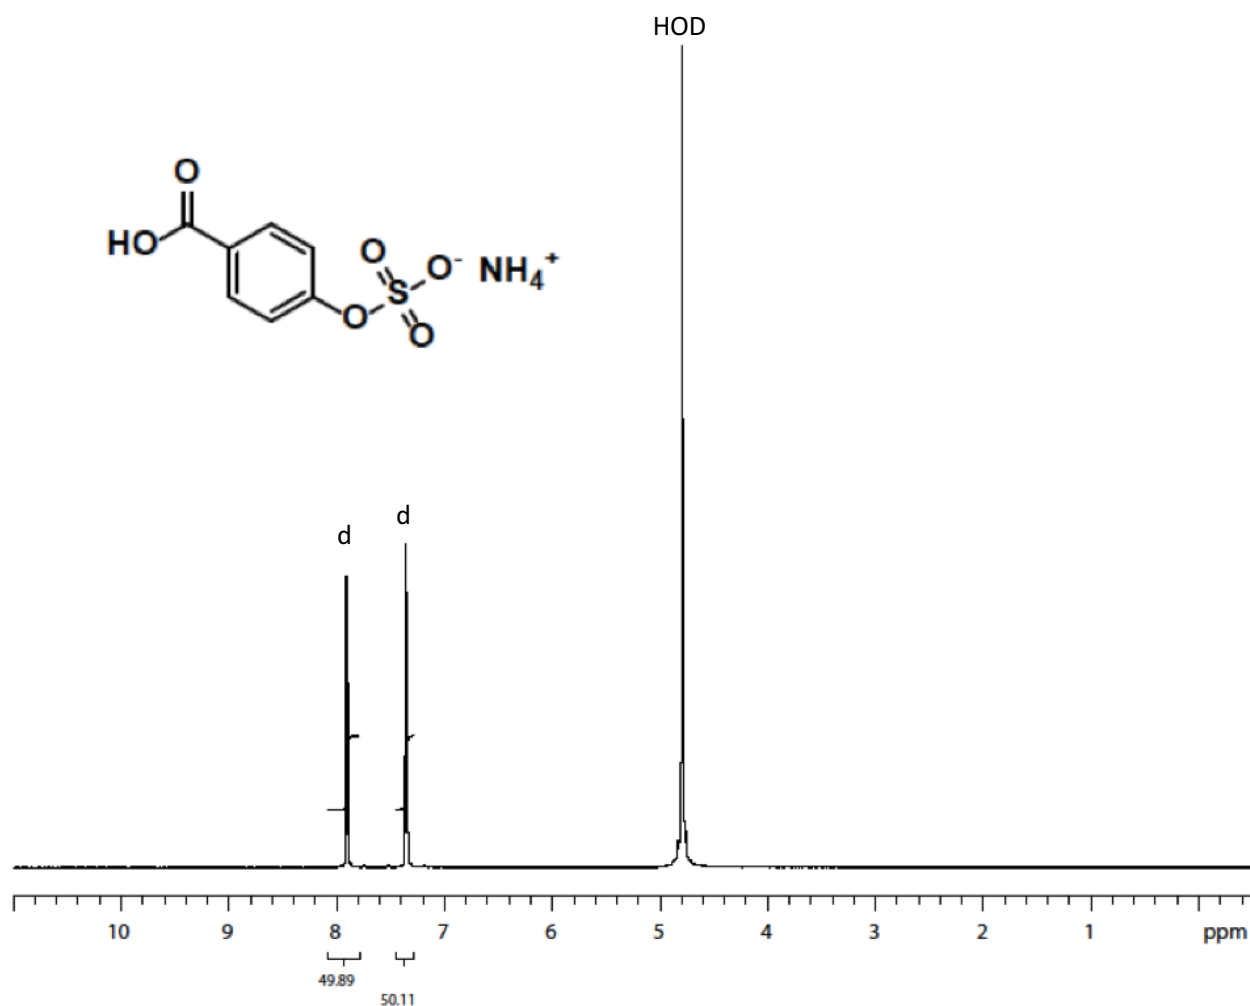

(B) Vanillic acid 4-sulfate

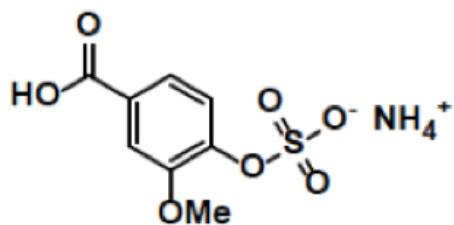

HOD

s

dd  
dd

d

10 9 8 7 6 5 4 3 2 1 ppm

0.950.97  
1.00

3.00

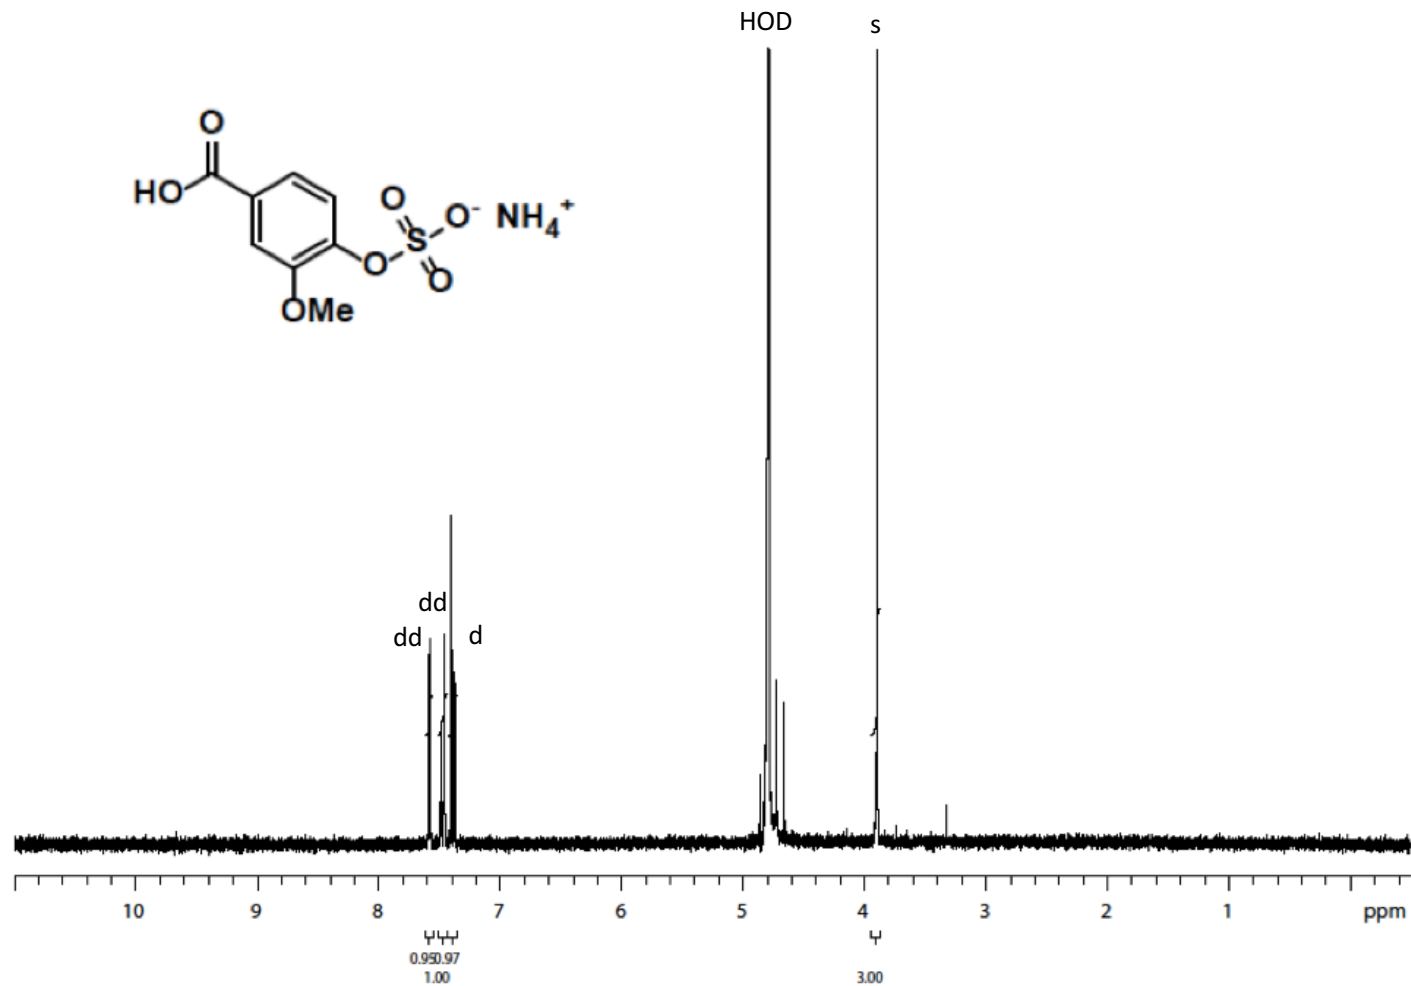

(C) Isovanillic acid 3-sulfate

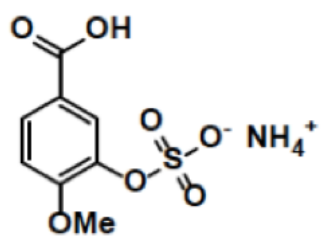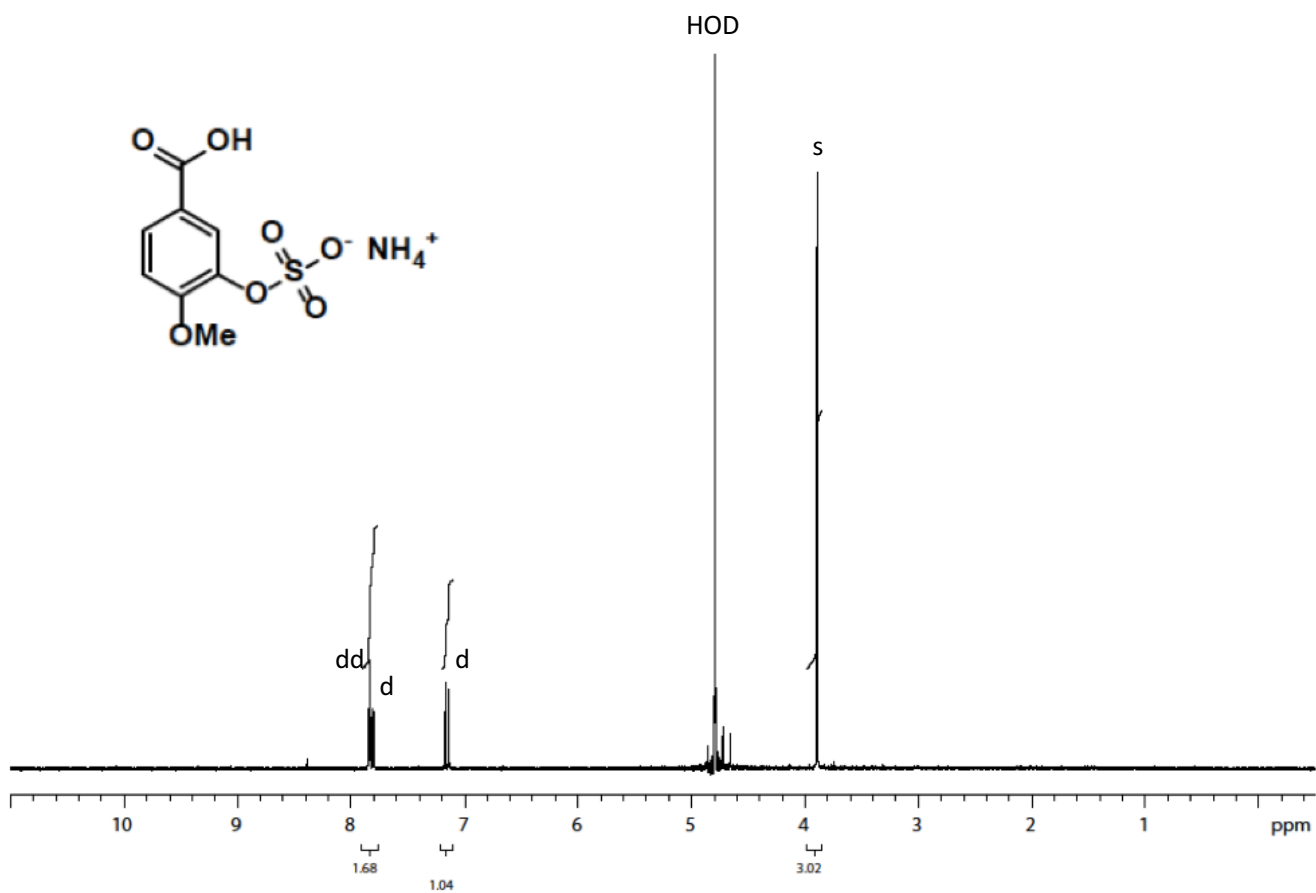

**Supplementary Fig 2.** Blueberry metabolites and/or palmitate treatment at the dosage and duration used in this study did not affect the cell viability. **(A)** HAEC treated  $\pm$  blueberry metabolites (BBM) or palmitate (Pal) or BSA for 6 h. Cell viability was estimated as [(number of cells per field before treatment – number of cells per field after treatment) / (number of cells per field before treatment)] x 100. **(B)** HAEC treated  $\pm$  BBM  $\pm$  DMSO for 6 h and with or without palmitate-BSA (Pal) or vehicle (BSA) for the last 5 h. Cell viability was assessed using cell titer blue (Promega, Madison, WI) based on manufacturer’s instruction. Trypsin (Tryp) was used as positive control. Values are mean  $\pm$  SEM,  $n=4$  (means of triplicate). Means without a common letter differ,  $P < 0.05$ .

**A**

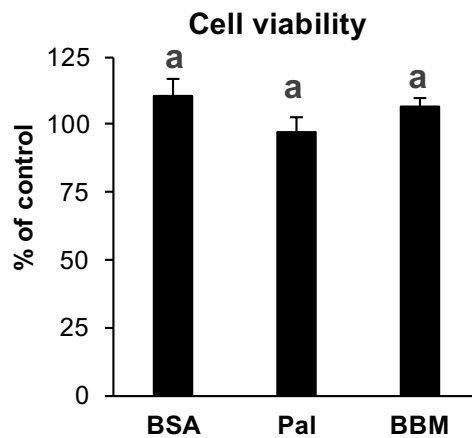

**B**

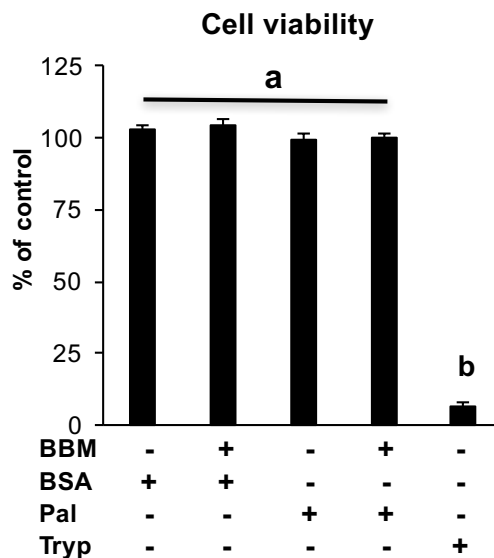

**Supplementary Table.** Aorta segments were incubated for 16 h with BSA + vehicle (BSA), palmitate-BSA (Pal), or palmitate + blueberry metabolites (Pal + BBM) and used to assess vascular function. Values are mean  $\pm$  SEM,  $n=8$  aorta segments per condition.

| Vessel characteristics |                          |                               |                              |                                                               |
|------------------------|--------------------------|-------------------------------|------------------------------|---------------------------------------------------------------|
| Groups                 | Length ( $\mu\text{M}$ ) | Start width ( $\mu\text{M}$ ) | Resting tension at Lmax (mg) | Tension developed at Lmax/ Vessel length (mg/ $\mu\text{M}$ ) |
| BSA                    | 1838 $\pm$ 121           | 394 $\pm$ 32                  | 2084 $\pm$ 177               | 0.698 $\pm$ 0.071                                             |
| Pal                    | 1788 $\pm$ 124           | 369 $\pm$ 28                  | 2045 $\pm$ 185               | 0.533 $\pm$ 0.072                                             |
| Pal + BBM              | 1863 $\pm$ 53            | 388 $\pm$ 23                  | 2178 $\pm$ 237               | 0.507 $\pm$ 0.070                                             |
